# Supplementary material for: The impact of mindfulness apps on psychological processes of change: a systematic review
Source: Springer Nature journal article supplement (doi:10.1038/s44184-023-00048-5), 2024-03-18
Supplement: MOESM1 [file 44184_2023_48_MOESM1_ESM.pdf]

## eSUPPLEMENT

eFigure 1. Study Inclusion Flowchart

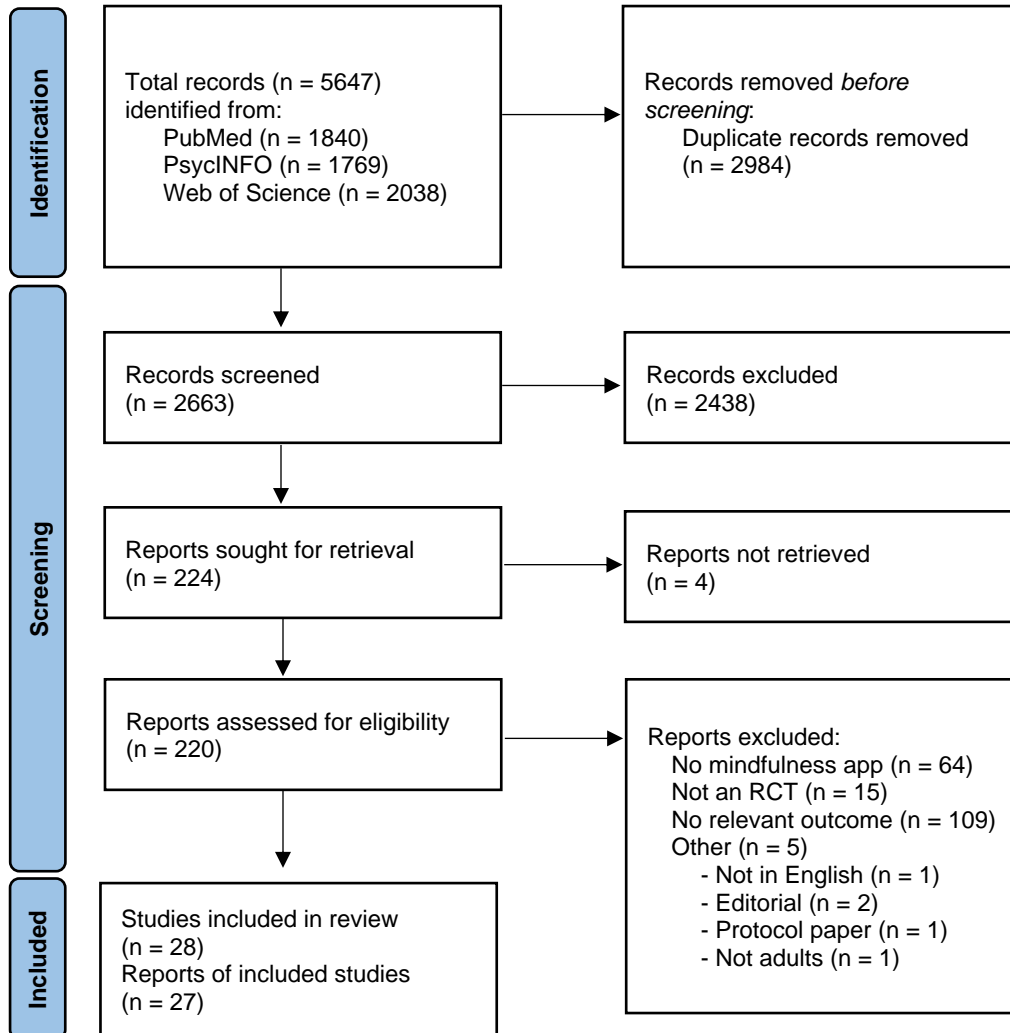

**eTable1. Mindfulness Theory Papers Proposing Mechanisms of Change**

| Theory Paper                               | Mechanisms Proposed                                                                                                                                                                                                                                                                                                                                                                                                                                                                                                                                                                                                                                                                                                                                                                                                                                                                                                                                                                                                                                                                                                                                                                                                                                                                                        | Empirical support through mediation analysis                                                                                                                                                                                                                                                                                                   |
|--------------------------------------------|------------------------------------------------------------------------------------------------------------------------------------------------------------------------------------------------------------------------------------------------------------------------------------------------------------------------------------------------------------------------------------------------------------------------------------------------------------------------------------------------------------------------------------------------------------------------------------------------------------------------------------------------------------------------------------------------------------------------------------------------------------------------------------------------------------------------------------------------------------------------------------------------------------------------------------------------------------------------------------------------------------------------------------------------------------------------------------------------------------------------------------------------------------------------------------------------------------------------------------------------------------------------------------------------------------|------------------------------------------------------------------------------------------------------------------------------------------------------------------------------------------------------------------------------------------------------------------------------------------------------------------------------------------------|
| Shapiro et al. (2006)                      | Proposed a theory describing <b>reperceiving</b> as the primary mechanism of mindfulness. Reperceiving is defined as “the capacity of dispassionately observe or witness the contents of one’s consciousness” (Shapiro et al., 2006). In other words, it is a change in relating to experience with greater distance so one can be more present without clinging to or pushing away experience. Reperceiving is described as “intimate detachment” and is synonymous such terms as “ <b>decentering</b> ,” “defusion,” “distancing,” and “de-automatization.” Shapiro and colleagues explained that change in reperceiving facilitates change in several secondary mechanisms, including <b>self-regulation</b> or self-management (reperceiving allows one to change automatic habits and access a broader range of adaptive coping skills), <b>values clarification</b> (reperceiving allows one to understand what is meaningful to oneself rather than acting automatically based on what they have learned to be meaningful from family/society, etc.), <b>cognitive/emotional/behavioral flexibility</b> (responding rather than reflexively reacting to the environment), and <b>exposure</b> (a person can now experience even very strong emotions with greater objectivity and less reactivity). | <i>decentering</i> <sup>1-3</sup><br><i>self-regulation</i> <sup>4</sup><br><i>values</i> <sup>4</sup><br><i>acceptance/psychological flexibility</i> <sup>2,4,5</sup>                                                                                                                                                                         |
| Holzel et al. (2011)                       | Proposed 4 mechanisms of action: <b>attention regulation</b> , <b>body awareness</b> , <b>emotion regulation</b> (including <b>reappraisal</b> , and <b>exposure</b> , <b>extinction</b> , and <b>reconsolidation</b> ), and <b>change in perspective of the self</b> . This team of researchers suggested that these constructs are present in meditation instructions and gave a list of empirical studies in support of the idea that mindfulness meditation changes these processes. Reappraisal was defined by Holzel and colleagues (2011) as “approaching ongoing emotional reactions in a different way ( <b>nonjudgmentally</b> , with <b>acceptance</b> ; e.g., increases in positive reappraisal)”. Exposure, extinction, and reconsolidation were, respectively, defined as “exposing oneself to whatever is present in the field of <b>awareness</b> ; letting oneself be affected by it; refraining from internal reactivity (e.g., increases in <b>nonreactivity</b> ).”                                                                                                                                                                                                                                                                                                                    | <i>attention regulation</i> <sup>2,5</sup><br><i>awareness</i> <sup>2,5</sup><br><i>emotion regulation</i> <sup>6</sup> ( <i>re-appraisal</i> , <sup>7,8</sup> <i>suppression</i> <sup>7,8</sup><br><i>worry</i> , <sup>7,8</sup> <i>rumination</i> <sup>7,8</sup> )<br><i>non-judgment</i> <sup>5</sup><br><i>non-reactivity</i> <sup>9</sup> |
| Lindsay & Creswell (2017)                  | Put forth the Monitor and Acceptance Theory (MAT), which suggests that <b>attention</b> monitoring and <b>acceptance</b> together mediate the effects of mindfulness practice on cognition, affect, stress, and health. The emphasis of this theory is that attentional monitoring and acceptance work synergistically to lead to the beneficial effects of mindfulness practice. Attention monitoring alone can lead to higher, rather than lower, reactivity, and thus, acceptance is key in order to relate to what one is monitoring in a non-reactive way.                                                                                                                                                                                                                                                                                                                                                                                                                                                                                                                                                                                                                                                                                                                                            | <i>see above</i>                                                                                                                                                                                                                                                                                                                               |
| Garland, Farb, Goldin & Fredrickson (2015) | Proposed the Mindfulness-to-Meaning Theory (MMT). Rather than focusing on how mindfulness reduces negative affect and experiences, this theory centers on how it encourages positive experiences and well-being. A key mechanism connecting mindfulness practice to more distal markers of well-being is <b>positive affect</b> , brought about by the <b>decentering</b> , broadening of <b>attention</b> , and <b>reappraisal</b> that mindfulness engenders, according to MMT (Garland et al., 2015; Garland et al., 2017).                                                                                                                                                                                                                                                                                                                                                                                                                                                                                                                                                                                                                                                                                                                                                                             | <i>positive affect</i> <sup>10,11</sup><br><i>see above for remaining constructs</i>                                                                                                                                                                                                                                                           |

**eTable2. Search Strategy**

|                                                                                                                                                                                                                                                                                                              |                                                                                                                                                                                                                                                                                                                                                                                                                                                                                                                                                                                                                                                                                                                                                                                                                                                                                                                                                                                                                                                                                                                                                                                                                                              |
|--------------------------------------------------------------------------------------------------------------------------------------------------------------------------------------------------------------------------------------------------------------------------------------------------------------|----------------------------------------------------------------------------------------------------------------------------------------------------------------------------------------------------------------------------------------------------------------------------------------------------------------------------------------------------------------------------------------------------------------------------------------------------------------------------------------------------------------------------------------------------------------------------------------------------------------------------------------------------------------------------------------------------------------------------------------------------------------------------------------------------------------------------------------------------------------------------------------------------------------------------------------------------------------------------------------------------------------------------------------------------------------------------------------------------------------------------------------------------------------------------------------------------------------------------------------------|
| <p><b>Pubmed<br/>Keyword Search</b></p> <p>Narrowed by:<br/>publication year (1993-2022)</p>                                                                                                                                                                                                                 | <p>((mindful*[Title/Abstract] OR meditat*[Title/Abstract])) AND (("smartphone"[MeSH Terms] OR "smart phone"*[Title/Abstract] OR smartphone*[Title/Abstract] OR "smart phone"*[Title/Abstract] OR smart-phone*[Title/Abstract] OR cellphone*[Title/Abstract] OR "cell phone"*[Title/Abstract] OR cell-phone*[Title/Abstract] OR "cellular phone"*[Title/Abstract] OR mobile*[Title/Abstract] OR "mobile phone"*[Title/Abstract] OR "mobile device"*[Title/Abstract] OR "mobile health"[Title/Abstract] OR app[Title/Abstract] OR apps[Title/Abstract] OR application*[Title/Abstract] OR mobile-based[Title/Abstract] OR "mobile based"[Title/Abstract] OR digital[Title/Abstract] OR "digital health"[Title/Abstract] OR iphone*[Title/Abstract] OR android*[Title/Abstract] OR mhealth[Title/Abstract] OR m-health[Title/Abstract] OR tablet-based[Title/Abstract] OR ipad[Title/Abstract] OR "app delivered"[Title/Abstract] OR app-delivered[Title/Abstract]))</p>                                                                                                                                                                                                                                                                        |
| <p><b>APA PsycINFO<br/>Keyword Search</b></p> <p>Narrowed by:</p> <ul style="list-style-type: none"> <li>• publication year (1993-2022)</li> <li>• kept academic journals, books, electronic collections</li> <li>• excluded non-English</li> </ul>                                                          | <p>(AB mindful* OR TI mindful* OR AB meditat* OR TI meditat*) AND (AB smartphone* OR AB smart-phone* OR AB cellphone* OR AB "cell phone*" OR AB cell-phone* OR AB "cellular phone*" OR AB mobile* OR AB "mobile phone*" OR AB "mobile device*" OR AB "mobile health" OR AB app OR AB apps OR AB application* OR AB mobile-based OR AB "mobile based" OR AB digital OR AB "digital health" OR AB iphone* OR AB android* OR AB mhealth OR AB m-health OR AB tablet-based OR AB ipad OR AB "app delivered" OR AB app-delivered OR TI smartphone* OR TI smart-phone* OR TI cellphone* OR TI "cell phone*" OR TI cell-phone* OR TI "cellular phone*" OR TI mobile* OR TI "mobile phone*" OR TI "mobile device*" OR TI "mobile health" OR TI app OR TI apps OR TI application* OR TI mobile-based OR TI "mobile based" OR TI digital OR TI "digital health" OR TI iphone* OR TI android* OR TI mhealth OR TI m-health OR TI tablet-based OR TI ipad OR TI "app delivered" OR TI app-delivered)</p>                                                                                                                                                                                                                                                 |
| <p><b>Web of Science<br/>Keyword Search</b></p> <p>Narrowed by:</p> <ul style="list-style-type: none"> <li>• publication year (1993-2022)</li> <li>• kept article, early access, book chapters, review article, editorial material, letter, correction, news item</li> <li>• excluded non-English</li> </ul> | <p>#3 AND (#5 OR #4)</p> <p>#3: (((TI=(mindful*)) OR AB=(mindful*)) OR AB=(meditat*)) OR TI=(meditat*)</p> <p>#4: (((((((((((((((((((((((TI=(smartphone*)) OR TI=(smart-phone*)) OR TI=(cellphone*)) OR TI=("cell phone*") OR TI=(cell-phone*)) OR TI=("cellular phone*") OR TI=(mobile*)) OR TI=("mobile phone*") OR TI=("mobile device*") OR TI=("mobile health")) OR TI=(app)) OR TI=(apps)) OR TI=(application*)) OR TI=(mobile-based)) OR TI=("mobile based")) OR TI=(digital)) OR TI=("digital health")) OR TI=(iphone*)) OR TI=(android*)) OR TI=(mhealth)) OR TI=(m-health)) OR TI=(tablet-based)) OR TI=(ipad)) OR TI=("app delivered")) OR TI=(app-delivered)</p> <p>#5: (((((((((((((((((((((((AB=(smartphone*)) OR AB=(smart-phone*)) OR AB=(cellphone*)) OR AB=("cell phone*") OR AB=(cell-phone*)) OR AB=("cellular phone*") OR AB=(mobile*)) OR AB=("mobile phone*") OR AB=("mobile device*") OR AB=("mobile health")) OR AB=(app)) OR AB=(apps)) OR AB=(application*)) OR AB=(mobile-based)) OR AB=("mobile based")) OR AB=(digital)) OR AB=("digital health")) OR AB=(iphone*)) OR AB=(android*)) OR AB=(mhealth)) OR AB=(m-health)) OR AB=(tablet-based)) OR AB=(ipad)) OR AB=("app delivered")) OR AB=(app-delivered)</p> |

**eTable3. Risk of Bias Ratings**

|                             | SELECTION<br>BIAS | ALLOCA-<br>TION BIAS | CONFOU-<br>NDERS | BLINDING | MEASU-<br>REMENT | ATTRITI-<br>ON BIAS | ANALYSIS | IMPLEME-<br>NTATION<br>BIAS | OVERALL<br>RATING |
|-----------------------------|-------------------|----------------------|------------------|----------|------------------|---------------------|----------|-----------------------------|-------------------|
| Abbott 2023 (USA)           | W                 | W                    | W                | NA       | S                | W                   | M        | M                           | W                 |
| Ainsworth 2022 (UK)         | W                 | S                    | M                | NA       | S                | M                   | M        | M                           | M                 |
| Walsh 2019 (Canada)         | W                 | W                    | W                | W        | S                | S                   | M        | M                           | W                 |
| Axelsen 2022 (Denmark)      | M                 | M                    | W                | NA       | S                | M                   | M        | M                           | M                 |
| Taylor 2022 (UK)            | W                 | S                    | W                | NA       | S                | M                   | S        | M                           | W                 |
| Levin 2022 (USA)            | W                 | M                    | M                | W        | S                | M                   | M        | M                           | W                 |
| Hirshberg 2022 (USA)        | W                 | S                    | W                | NA       | S                | S                   | S        | M                           | W                 |
| Gao 2022 (USA)              | W                 | S                    | M                | S        | S                | S                   | S        | M                           | M                 |
| Schulte 2021 (Germany)      | W                 | S                    | W                | NA       | S                | M                   | M        | M                           | W                 |
| Sun 2021 (China)            | W                 | S                    | W                | S        | S                | M                   | S        | M                           | W                 |
| Versluis 2020 (Netherlands) | W                 | S                    | W                | W        | S                | S                   | M        | M                           | W                 |
| Haliwa 2021 (USA)           | W                 | M                    | W                | W        | W                | S                   | S        | M                           | W                 |
| Rich 2021 (UK)              | W                 | M                    | W                | W        | S                | S                   | S        | M                           | W                 |
| Roy 2021 (USA)              | W                 | S                    | W                | S        | S                | S                   | S        | M                           | W                 |
| Orosa 2021 (Spain)          | W                 | M                    | W                | S        | S                | W                   | M        | M                           | W                 |
| Low 2020 (Australia)        | W                 | W                    | W                | W        | M                | S                   | M        | M                           | W                 |
| Goldberg 2020 (USA)         | W                 | S                    | W                | NA       | S                | W                   | S        | M                           | W                 |
| Ziegler 2019 (USA)          | W                 | M                    | W                | S        | S                | M                   | M        | M                           | W                 |
| Yang 2018 (USA)             | W                 | M                    | W                | NA       | S                | M                   | S        | M                           | W                 |
| van Emm. 2018 (Netherlands) | W                 | M                    | W                | NA       | S                | W                   | S        | M                           | W                 |
| Howells 2016 (11 countries) | M                 | M                    | W                | NA       | S                | M                   | M        | M                           | M                 |
| Ly 2014 (Sweden)            | W                 | M                    | W                | S        | S                | S                   | M        | M                           | W                 |
| Sala 2021 (USA)             | W                 | M                    | W                | S        | M                | M                   | M        | M                           | W                 |
| Bjorkstrand2019 (Sweden)    | W                 | W                    | W                | W        | S                | S                   | M        | M                           | W                 |
| Huberty 2019 (USA)          | W                 | M                    | W                | NA       | S                | S                   | M        | M                           | W                 |
| Kubo 2019 (USA)             | M                 | S                    | W                | W        | S                | M                   | M        | M                           | W                 |
| Versluis 2018 (Netherlands) | W                 | S                    | W                | W        | S                | S                   | S        | M                           | W                 |

Note. Risk of bias was assessed with the Quality Assessment Tool for Quantitative Studies (Thomas et al., 2004). W = Weak. M = Moderate. S = Strong. NA = Not Applicable. Tool guidance suggested an overall study rating of S if no W section ratings, M if one W section rating, and W if two or more W section ratings.

**eTable4. Domain-Specific Quality Assessment Question & Section Ratings**

| Study          | Selection |      | S<br>E<br>C<br><br>R<br>A<br>T | Allocation |     |     | S<br>E<br>C<br><br>R<br>A<br>T | Confounders |     |     |         | S<br>E<br>C<br><br>R<br>A<br>T | Blinding | S<br>E<br>C<br><br>R<br>A<br>T | Measurement |     | S<br>E<br>C<br><br>R<br>A<br>T | Attrition | S<br>E<br>C<br><br>R<br>A<br>T | Analysis |     |     |     | Notes                            | Implementation |     |     |
|----------------|-----------|------|--------------------------------|------------|-----|-----|--------------------------------|-------------|-----|-----|---------|--------------------------------|----------|--------------------------------|-------------|-----|--------------------------------|-----------|--------------------------------|----------|-----|-----|-----|----------------------------------|----------------|-----|-----|
|                | Q 1       | Q 2  |                                | Q 1        | Q 2 | Q 3 |                                | Q1          | Q 2 | Q 3 | Q 4     |                                |          |                                | Q 1         | Q 1 |                                |           |                                | Q 2      | Q 1 | Q 2 | Q 3 |                                  | Q 4            | Q 1 | Q 2 |
| Ainsworth 2022 | SL        | <60% | W                              | Y          | Y   | Y   | S                              | Y           | Y   | Y   | 3,5,8   | M                              | NA       | NA                             | Y           | Y   | S                              | 60-79%    | M                              | N        | N   | Y   | Y   |                                  | NA             | Y   | CT  |
| Abbott 2023    | NL        | NR   | W                              | N          | NR  | NR  | W                              | N           | NA  | Y   | 2-5     | W                              | NA       | NA                             | Y           | Y   | S                              | <60%      | W                              | Y        | N   | Y   | Y   | underpowered                     | <60%           | Y   | CT  |
| Walsh 2019     | NL        | NR   | W                              | N          | NR  | N   | W                              | N           | NA  | Y   | 2-8     | W                              | NR       | W                              | Y           | Y   | S                              | 80-100%   | S                              | Y        | N   | Y   | Y   | underpowered for interactions    | 60-79%         | NR  | CT  |
| Axelsen 2022   | SL        | NA   | M                              | Y          | NR  | N   | M                              | CT          | NA  | Y   | 1,3-6,8 | W                              | NA       | NA                             | Y           | Y   | S                              | 60-79%    | M                              | Y        | Y   | Y   | N   |                                  | NR             | Y   | CT  |
| Taylor 2022    | SL        | NR   | W                              | Y          | Y   | Y   | S                              | N           | NA  | Y   | 2,3,5-7 | W                              | NA       | NA                             | Y           | Y   | S                              | 60-79%    | M                              | Y        | N   | Y   | Y   |                                  | NR             | Y   | Y   |
| Levin 2022     | SL        | NR   | W                              | Y          | Y   | N   | M                              | N           | NA  | Y   | 2,3,5   | M                              | NR       | W                              | Y           | Y   | S                              | 60-79%    | M                              | N        | Y   | Y   | N   | limited power                    | NR             | NR  | CT  |
| Hirshberg 2022 | NL        | NA   | W                              | Y          | Y   | Y   | S                              | N           | NA  | Y   | 3,5-8   | W                              | NA       | NA                             | Y           | Y   | S                              | 80-100%   | S                              | Y        | Y   | Y   | Y   |                                  | NA             | Y   | CT  |
| Gao 2022       | NL        | NA   | W                              | Y          | Y   | Y   | S                              | Y           | Y   | Y   | 2,3,5,8 | W                              | Y        | S                              | Y           | Y   | S                              | 80-100%   | S                              | Y        | Y   | Y   | Y   |                                  | NA             | NR  | CT  |
| Schulte 2021   | NL        | NA   | W                              | Y          | Y   | Y   | S                              | CT          | NA  | Y   | 3,5-8   | W                              | NA       | NA                             | Y           | Y   | S                              | 60-79%    | M                              | Y        | Y   | Y   | CT  | potentially underpowered         | NR             | NR  | CT  |
| Sun 2021       | SL        | <60% | W                              | Y          | Y   | Y   | S                              | N           | NA  | Y   | 3,5     | W                              | Y        | S                              | Y           | Y   | S                              | 60-79%    | M                              | Y        | Y   | Y   | Y   |                                  | NR             | NR  | CT  |
| Versluis 2020  | NL        | NA   | W                              | Y          | Y   | Y   | S                              | N           | NA  | Y   | 2,3,5   | W                              | NR       | W                              | Y           | Y   | S                              | 80-100%   | S                              | Y        | N   | Y   | Y   | underpowered                     | NR             | NR  | CT  |
| Haliwa 2021    | NL        | NR   | W                              | Y          | Y   | N   | M                              | CT          | NA  | Y   | 1-8     | W                              | NR       | W                              | N           | N   | W                              | 80-100%   | S                              | Y        | N   | Y   | Y   |                                  | NR             | NR  | CT  |
| Rich 2021      | NL        | NR   | W                              | Y          | Y   | N   | M                              | N           | NA  | Y   | 3,5-7   | W                              | NR       | W                              | Y           | Y   | S                              | 80-100%   | S                              | Y        | N   | Y   | Y   |                                  | NR             | NR  | CT  |
| Roy 2021       | NL        | NA   | W                              | Y          | Y   | Y   | S                              | CT          | NA  | Y   | 1-5,8   | W                              | Y        | S                              | Y           | Y   | S                              | 80-100%   | S                              | Y        | Y   | Y   | Y   |                                  | NR             | NR  | CT  |
| Orosa 2021     | NL        | NR   | W                              | Y          | Y   | N   | M                              | N           | NA  | Y   | 3,5-8   | W                              | Y        | S                              | Y           | Y   | S                              | <60%      | W                              | Y        | N   | Y   | Y   | underpowered                     | NR             | NR  | CT  |
| Low 2020       | NL        | NA   | W                              | N          | N   | N   | W                              | CT          | NA  | Y   | 1-5,8   | W                              | N        | W                              | Y           | Y   | M                              | 100%      | S                              | N        | N   | Y   | Y   | underpowered                     | NR             | NR  | Y   |
| Goldberg 2020  | NL        | NA   | W                              | Y          | Y   | Y   | S                              | N           | NA  | Y   | 3,5,7,8 | W                              | NA       | NA                             | Y           | Y   | S                              | <60%      | W                              | Y        | Y   | Y   | Y   |                                  | NA             | Y   | CT  |
| Ziegler 2019   | NL        | NA   | W                              | N          | NR  | Y   | M                              | CT          | NA  | Y   | 1,3-5,8 | W                              | Y        | S                              | Y           | Y   | S                              | 60-79%    | M                              | Y        | Y   | Y   | CT  | underpowered                     | NR             | Y   | CT  |
| Yang 2018      | SL        | <60% | W                              | Y          | Y   | N   | M                              | CT          | NA  | Y   | 2,3,5-8 | W                              | NA       | NA                             | Y           | Y   | S                              | 60-79%    | M                              | N        | N   | Y   | Y   |                                  | 60-79%         | Y   | CT  |
| van Emm. 2018  | NL        | NA   | W                              | Y          | Y   | N   | M                              | N           | NA  | Y   | 2,3,5-8 | W                              | NA       | NA                             | Y           | Y   | S                              | <60%      | W                              | Y        | Y   | Y   | Y   |                                  | NA             | Y   | CT  |
| Howells 2016   | SL        | NA   | M                              | Y          | Y   | N   | M                              | N           | NA  | Y   | 2,3,5-8 | W                              | NA       | NA                             | Y           | Y   | S                              | 60-79%    | M                              | N        | Y   | Y   | Y   |                                  | NR             | Y   | CT  |
| Ly 2014        | NL        | NA   | W                              | Y          | Y   | N   | M                              | N           | NA  | Y   | 2,3,5,6 | W                              | Y        | S                              | Y           | Y   | S                              | 80-100%   | S                              | Y        | N   | Y   | Y   | underpowered                     | NA             | NR  | CT  |
| Sala 2021      | NL        | NA   | W                              | Y          | NR  | N   | M                              | N           | NA  | Y   | 3,5-8   | W                              | Y        | S                              | Y           | N   | M                              | 60-79%    | M                              | N        | N   | Y   | Y   |                                  | NA             | Y   | CT  |
| Bjork. 2019    | NL        | NA   | W                              | N          | NR  | N   | W                              | CT          | NA  | Y   | 1,3-5   | W                              | NR       | W                              | Y           | Y   | S                              | 80-100%   | S                              | Y        | Y   | Y   | Y   | underpowered                     | NR             | NR  | CT  |
| Huberty 2019   | NL        | NA   | W                              | Y          | Y   | N   | M                              | N           | NA  | Y   | 3-6     | W                              | NA       | NA                             | Y           | Y   | S                              | 80-100%   | S                              | Y        | Y   | Y   | N   | underpowered for 2ndary outcomes | NR             | Y   | CT  |

|               |    |    |   |   |   |   |   |   |    |   |         |   |    |   |   |   |   |         |   |   |   |   |   |              |    |    |    |
|---------------|----|----|---|---|---|---|---|---|----|---|---------|---|----|---|---|---|---|---------|---|---|---|---|---|--------------|----|----|----|
| Kubo 2019     | SL | NA | M | Y | Y | Y | S | Y | N  | Y | 2,3,5-7 | W | NR | W | Y | Y | S | 60-79%  | M | N | N | Y | Y | small sample | NR | Y  | CT |
| Versluis 2018 | NL | NA | W | Y | Y | Y | S | N | NA | Y | 2,3,5,6 | W | N  | W | Y | Y | S | 80-100% | S | Y | N | Y | Y |              | NR | NR | CT |

**Note.** Risk of bias was assessed with the Quality Assessment Tool for Quantitative Studies (Thomas et al., 2004). Each domain of bias was assessed using the following questions, and an overall section rating was determined. **Selection:** Q1 Are the individuals selected to participate in the study likely to be representative of the target population? Q2 What percentage of selected individuals agreed to participate? **Allocation:** Q1 Is the method of random allocation stated? Q2, If the method of random allocation is stated is it appropriate? Q3 Was the method of random allocation reported as concealed? **Confounders:** Q1 Prior to the intervention were there between group differences for important confounders reported in the paper? Q2 If there were differences between groups for important confounders, were they adequately managed in the analysis? Q3 Were there important confounders not reported in the paper? Q4 List relevant confounders NOT reported in the study. **Blinding:** Q1 Was (were) the outcome assessor(s) blinded to the intervention or exposure status of participants? **Measurement:** Q1 Were data collection tools shown or are they known to be valid? Q2 Were data collection tools shown or are they known to be reliable? **Attrition:** Q1 Indicate the percentage of participants completing the study. **Analysis:** Q1 Is there a sample size calculation or power calculation? Q2 Is there a statistically significant difference between groups? Q3 Are the statistical methods appropriate? Q4 Is the analysis performed by intervention allocation status (i.e. intention to treat) rather than the actual intervention received? **Intervention Integrity:** Q1 What percentage of participants received the allocated intervention or exposure of interest? Q2 Was the consistency of the intervention measured? Q3 Is it likely that subjects received an unintended intervention (contamination or cointervention) that may influence the results? **SL** = Somewhat Likely. **NL** = Not Likely. **NA** = Not Applicable. **NR** = Not Reported. **CT** = Can't Tell. For confounders, 1 = demographic differences, 2 = prior mindfulness experience, 3 = digital literacy, 4 = education, 5 = self-efficacy, 6 = illness severity, 7 = other mental illnesses / comorbidity, 8 = currently in therapy. **SEC RAT** = Section Rating. **W** = Weak. **M** = Moderate. **S** = Strong.

**eTable5. App Engagement**

| Metrics                                                                                                                                                                                                                                                                                                                                                                                                                                  | Findings                                                                                                                                                                                                                                                                                                                                                                                                                                                                                                                                                                                                                                                                                                                |
|------------------------------------------------------------------------------------------------------------------------------------------------------------------------------------------------------------------------------------------------------------------------------------------------------------------------------------------------------------------------------------------------------------------------------------------|-------------------------------------------------------------------------------------------------------------------------------------------------------------------------------------------------------------------------------------------------------------------------------------------------------------------------------------------------------------------------------------------------------------------------------------------------------------------------------------------------------------------------------------------------------------------------------------------------------------------------------------------------------------------------------------------------------------------------|
| <p>We divided the average total minutes of app use in each study by the number of days of that study's intervention period to compute a more meaningful measure of minutes that could have been spent on the app across the intervention period. (Note that these daily averages were not actual averages of daily use but rather metrics calculated to make meaning of total numbers of use across different intervention periods.)</p> | <p>Average total minutes practiced were ...</p> <ul style="list-style-type: none"> <li>• 88.5 (about 9 minutes per day) in a 10-day study<sup>12</sup></li> <li>• 303 (about 14 mins/day) in a 21-day study<sup>13</sup></li> <li>• In three 4-week studies, 179 (about 6 mins/day<sup>14</sup>) to 89 (about 3 mins/day<sup>15</sup>)</li> <li>• In two 8-week studies, each reported 102 total minutes, which translates to about 2 mins of use per day<sup>16,17</sup></li> </ul>                                                                                                                                                                                                                                    |
| <p>To put the metric of average days of app use into context, we divided it by the number of available days in the intervention period in each of the 7 studies that reported this metric.</p>                                                                                                                                                                                                                                           | <ul style="list-style-type: none"> <li>• In one 21-week study, average days practiced were 16.59 (79% of the available days<sup>13</sup>)</li> <li>• In four 4-week studies, average days practiced ranged from 11.97 (43%<sup>18</sup> to 10.88 (39%<sup>19</sup>) to 7.44 (27%<sup>15</sup>) to 3.5 (12%<sup>20</sup>)</li> <li>• In a 5-week study, average days practiced were 25.48 (73%<sup>21</sup>)</li> <li>• In one 8-week study, 10.52 (19%<sup>16</sup>), In a 12-week study, average days was 51 (60%<sup>22</sup>)</li> </ul>                                                                                                                                                                             |
| <p>The percentage of participants that adhered to the dose of the app that researchers had recommended was most commonly not reported.</p>                                                                                                                                                                                                                                                                                               | <p>Instead, some studies reported “bare minimum” use – that is, the percentage of people who used the app at least once, which ranged from 60%<sup>18</sup> to 70%<sup>22</sup> to 79%<sup>19</sup> to 100%.<sup>15</sup> Other studies reported percentages of high engagers. For example, one reported that among study completers in the intervention arm, 33% of patients and 39% of caregivers used the mindfulness app at least 70% of the days in the 8-week study period.<sup>23</sup> In other studies, this percentage ranged from 8% completing the entire 8-week program<sup>24</sup> to 53% completing the program after the 8-week intervention period and 73% at the 4-month follow-up.<sup>25</sup></p> |

eTable6. Table Used in Synthesis Process

| T1<br>Ef-<br>fect<br>A | First Author<br>& Year<br>(Study<br>Location) | MF App<br>Tested               | Active<br>Ctrl<br>Grp | Pas-<br>sive<br>Ctrl<br>Grp | Sup-<br>port<br>B | Incen-<br>tives<br>C | Drop-<br>out<br>Rate | Inter-<br>vention<br>Length<br>(wks) | F/up<br>(wks) | MF<br>App<br>Grp<br>(N) | Ctrl<br>Grp<br>(N) | Sample<br>Description                                                | Age<br>(M)                                                                         | Age<br>(SD) | Gender                                        | Race/<br>Ethnicity                                                     | Results at Post-<br>Intervention                                                                                                                                                                        | Effect Sustained at<br>F/upp?                                                                                                                                                               |
|------------------------|-----------------------------------------------|--------------------------------|-----------------------|-----------------------------|-------------------|----------------------|----------------------|--------------------------------------|---------------|-------------------------|--------------------|----------------------------------------------------------------------|------------------------------------------------------------------------------------|-------------|-----------------------------------------------|------------------------------------------------------------------------|---------------------------------------------------------------------------------------------------------------------------------------------------------------------------------------------------------|---------------------------------------------------------------------------------------------------------------------------------------------------------------------------------------------|
| Awareness (n = 15)     |                                               |                                |                       |                             |                   |                      |                      |                                      |               |                         |                    |                                                                      |                                                                                    |             |                                               |                                                                        |                                                                                                                                                                                                         |                                                                                                                                                                                             |
| 1                      | Levin 2022<br>(USA)                           | Stop,<br>Breathe, and<br>Think | -                     | WL                          | 0                 | 0                    | 30%                  | 4                                    | -             | 10                      | 13                 | Students on<br>college<br>counseling<br>center<br>waitlist           | 20.43                                                                              | 2.46        | 100%<br>female                                | 87% White<br>non-Hispanic,<br>9% White<br>Hispanic, 4%<br>AI & White   | Medium between-group<br>effect favoring the MF app<br>for acting with awareness,<br>Hedge's <i>g</i> = .68 (CI -0.17,<br>1.58)                                                                          | N/A                                                                                                                                                                                         |
| 1                      | Hirshberg<br>2022 (USA)                       | Healthy<br>Minds<br>Program    | -                     | WL                          | 1                 | 2                    | 13%                  | 4                                    | 12            | 344                     | 318                | Wisconsin<br>school<br>system<br>employees                           | <20y: 0.2%<br>20-30y: 15%<br>30-40y: 29%<br>40-50y: 30%<br>50-60y: 21%<br>>60y: 4% | NR          | 88% female<br>12% male<br>0.1% non-<br>binary | 91% White,<br>5% Latinx, 4%<br>Black/AfAm,<br>2% Asian/PI,<br>1% AI/AN | Small between-group effect<br>favoring MF app for mindful<br>action, <i>d</i> = 0.21 (CI 0.06,<br>0.36), <i>p</i> < 0.01                                                                                | No. Trend toward<br>significant effect at<br>12-week follow-up, <i>d</i><br>= 0.14 (CI -0.01,<br>0.29), <i>p</i> = 0.07                                                                     |
| 1                      | Rich 2021<br>(UK)                             | Headspace                      | -                     | WL                          | 1                 | NR                   | 19%                  | 8                                    | -             | 45                      | 56                 | University<br>employees                                              | NR                                                                                 | NR          | 70% female<br>30% male                        | NR                                                                     | Medium between-group<br>effect favoring MF app<br>group for acting with<br>awareness, <i>F</i> (1,122) = 8.05,<br><i>p</i> < 0.01, <i>d</i> = 0.51                                                      | N/A                                                                                                                                                                                         |
| 1                      | Roy 2021<br>(USA)                             | Unwinding<br>Anxiety           | -                     | TAU                         | 3                 | 2                    | 1%                   | 4                                    | 8             | 28                      | 33                 | Adults with<br>at least<br>moderate<br>worry (≥10<br>on GAD-7)       | 41.95                                                                              | 15.43       | 90% female<br>8% male<br>2% Other             | 87% White,<br>3% Black, 2%<br>Asian, 8%<br>Other                       | Large between-group effect<br>favoring MF app group for<br>interoceptive awareness,<br>median increase of 22 (IQR<br>30, <i>p</i> < 0.01, <i>r</i> = .72) in MF<br>app group & no change in<br>controls | Yes, effect persisted<br>at 8-week follow-up,<br>with median increase<br>of 26 (IQR 28.5, <i>p</i> <<br>0.01, <i>r</i> = 0.85) in MF<br>app group and no sig.<br>change in control<br>group |
| 1                      | Orosa-Duarte<br>2021 (Spain)<br>(p)           | REM Volver<br>a casa           | *                     | WL                          | NR                | 4                    | 45%                  | 8                                    | -             | 31                      | 53                 | Students of<br>health<br>sciences                                    | 23                                                                                 | 4.16        | 85% female<br>NR for other<br>genders         | NR                                                                     | Between-group effect<br>favoring MF app group;<br>larger changes in MF app<br>group than controls, change<br>= 3.6 (CI 0.1, 7.1)                                                                        | N/A                                                                                                                                                                                         |
| 1                      | van Emmerik<br>2018<br>(Netherlands)          | VGZ<br>Mindfulness<br>Coach    | -                     | WL                          | 1                 | 0                    | 41%                  | 8                                    | 20            | 191                     | 186                | Adults with<br>an interest<br>in<br>mindfulness<br>&<br>spirituality | 44.72                                                                              | 9.83        | 96% female<br>4% male                         | NR                                                                     | Medium between-group<br>effect favoring MF app<br>group, <i>b</i> = 2.95, <i>SE</i> = 0.59, <i>p</i><br>< 0.01, <i>d</i> = 0.49                                                                         | Yes, gains maintained<br>at 20-week follow-up,<br><i>b</i> = 2.56, <i>SE</i> = 0.70, <i>p</i><br>< 0.01, <i>d</i> = 0.57                                                                    |



|   |                               |                   |                                     |    |    |   |     |      |    |    |     |                                                                           |                 |       |                                    |                                                                                                       |                                                                                                                                                                                                                                                                                                |                                                                                                                                          |
|---|-------------------------------|-------------------|-------------------------------------|----|----|---|-----|------|----|----|-----|---------------------------------------------------------------------------|-----------------|-------|------------------------------------|-------------------------------------------------------------------------------------------------------|------------------------------------------------------------------------------------------------------------------------------------------------------------------------------------------------------------------------------------------------------------------------------------------------|------------------------------------------------------------------------------------------------------------------------------------------|
| 1 | Huberty 2019 (USA)            | Calm              | -                                   | WL | 1  | 2 | 19% | 8    | 12 | 33 | 39  | Adults with high stress ( $\geq 14$ on Perceived Stress Scale)            | 21.18           | 4.9   | 90% female<br>10% male             | 55% White, 17% Asian, 11% Biracial or Multiracial, 6% Black, 6% Other, 6% Prefer not to say           | Between-group effect favoring MF app group; greater significant improvement in MF app (vs. control) group (change = 4.74, $p < 0.01$ , effect size 0.83)                                                                                                                                       | Yes, changes sustained at 12-week follow-up                                                                                              |
| 2 | Orosa-Duarte 2021 (Spain) (a) | REM Volver a casa | Weekly in-person MBSR               | *  | NR | 4 | 45% | 8    | -  | 31 | 53  | Students of health science: (medicine, psychology, nursing, or nutrition) | 23              | 4.16  | 85% female<br>NR for other genders | NR                                                                                                    | No between-group differences; both app and active control group improved                                                                                                                                                                                                                       | N/A                                                                                                                                      |
| 2 | Yang 2018 (USA)               | Headspace         | -                                   | WL | 0  | 0 | 24% | 4    | 8  | 45 | 43  | All students from a Southeastern US medical school                        | 25.11           | NR    | 64% female<br>36% male             | 47% White, 25% Asian/PI, 10% Biracial/Multiracial, 7% Black, 6% Latinx, 6% Other                      | NR (only changes in primary outcomes were reported from pre- to post-intervention)                                                                                                                                                                                                             | No between-group differences; both MF app and controls improved from baseline to follow-up 8 weeks later, $F(2,138) = 4.29$ , $p < 0.05$ |
| 2 | Kubo 2019 (USA) (pt)          | Headspace         | -                                   | WL | 3  | 3 | 26% | 8    | -  | 40 | 32  | Patients with cancer currently/recently treated                           | 59 (median age) | NR    | 69% female<br>Other genders NR     | 65% White, 18% Other, 7% Asian, 6% AfAm, 4% Unknown                                                   | No between-group differences but trend toward significant between-group effect favoring MF app group, $F = 3.74$ , $p = 0.06$ , $d = 0.43$ ; MF app group had significant within-group increase from baseline ( $M 17.2$ , $SD 3.8$ ) to post-intervention ( $M 18.5$ , $SD 3.5$ ), $p < 0.05$ | N/A                                                                                                                                      |
| 2 | Ainsworth 2022 (UK)           | Headspace         | -                                   | WL | 0  | 0 | 30% | 6    | 12 | 93 | 51  | Adults with asthma                                                        | 51.11           | 14.65 | NR                                 | MF App Group: 97% White, 3% Indian<br>Control Group: 93% White, 2% Chinese/SE Asian, 2% Indian, 2% NR | No between-group differences but significant medium-sized increase in mindful awareness at 6 weeks in MF app group, mean diff -2.20 (CI -3.92, -0.48), $d = .32$                                                                                                                               | Yes, improvement sustained at 12-week follow-up in MF app group, mean diff = -4.65 (CI -6.19, -3.10), $d = 0.74$                         |
| 2 | Sala 2021 (USA)               | Craving to Quit   | App w/ same look as MF but only EMA | -  | 1  | 3 | 27% | 3.14 | -  | 93 | 135 | Adults who smoke 5+ cigarettes a day & had some motivation to quit        | 41.48           | 12.48 | 75% female<br>Other genders NR     | 81% White, 10% AfAm, 4% Hispanic/Latinx, 2% Multiracial, 1% Asian, 1%                                 | No between-group differences; awareness increased in both groups, $b = 0.01$ , $SE = 0.01$ (CI 0.00, 0.02), $p < 0.05$                                                                                                                                                                         | N/A                                                                                                                                      |

|                                |                                      |                             |             |     |   |    |     |      |    |     |     |                                                                       |                    |       |                                   |                                                                                         |                                                                                                                                                                                                  |                                                                                                                                                                   |
|--------------------------------|--------------------------------------|-----------------------------|-------------|-----|---|----|-----|------|----|-----|-----|-----------------------------------------------------------------------|--------------------|-------|-----------------------------------|-----------------------------------------------------------------------------------------|--------------------------------------------------------------------------------------------------------------------------------------------------------------------------------------------------|-------------------------------------------------------------------------------------------------------------------------------------------------------------------|
|                                |                                      |                             |             |     |   |    |     |      |    |     |     |                                                                       |                    |       |                                   | NatAm, & 1%<br>Unknown                                                                  |                                                                                                                                                                                                  |                                                                                                                                                                   |
| 3                              | Walsh 2019<br>(Canada)               | Wildflowers<br>app          | 2048<br>app | -   | 1 | 1  | 20% | 3    | -  | 45  | 41  | College<br>students                                                   | 20.02              | 2.53  | 84% female<br>NR other<br>genders | NR                                                                                      | No between- or within-group<br>differences                                                                                                                                                       | N/A                                                                                                                                                               |
| 3                              | Haliwa 2021<br>(USA)                 | Headspace                   | Peak<br>app | -   | 1 | 2  | 10% | 1.43 | -  | 69  | 70  | College<br>students<br>with<br>psychology<br>major                    | 19.43              | 1.26  | 81% female<br>19% male            | 74% White,<br>8% Black, 6%<br>Hispanic, 6%<br>Asian, 1%<br>NatAm, 5%<br>Other           | No between- or within-group<br>differences                                                                                                                                                       | N/A                                                                                                                                                               |
| 3                              | Kubo 2019<br>(USA)<br>(cg)           | Headspace                   | -           | WL  | 3 | 3  | 16% | 8    | -  | 13  | 13  | Caregivers<br>of patient<br>sample from<br>Kubo 2019<br>study         | 63<br>(median age) | NR    | 58% female<br>Other<br>genders NR | 77% White,<br>13% Other, 6%<br>Asian, 3%<br>AfAm                                        | No between- or within-group<br>differences                                                                                                                                                       | N/A                                                                                                                                                               |
| <b>Non-reactivity (n = 12)</b> |                                      |                             |             |     |   |    |     |      |    |     |     |                                                                       |                    |       |                                   |                                                                                         |                                                                                                                                                                                                  |                                                                                                                                                                   |
| 1                              | Gao 2022<br>(USA)                    | Unwinding<br>Anxiety        | -           | TAU | 1 | 2  | 11% | 8    | 16 | 36  | 35  | Adults with<br>sleep-<br>interfering<br>worry                         | 41.41              | 17.57 | 80% female<br>17% male            | 62% White,<br>15% Asian,<br>14% Biracial<br>or Multiracial,<br>7% Hispanic,<br>1% Black | Significant between-group<br>effect favoring MF app<br>group, $\beta = 3.8$ , $SE = 0.78$ , $p < 0.01$ ; MF app group<br>(control group) had a 27%<br>(4%) average increase in<br>non-reactivity | Yes, gains in MF<br>group maintained at<br>16-week follow-up, $p < 0.01$                                                                                          |
| 1                              | Rich 2021<br>(UK)                    | Headspace                   | -           | WL  | 1 | NR | 19% | 8    | -  | 45  | 56  | University<br>employees                                               | NR                 | NR    | 70% female<br>30% male            | NR                                                                                      | Medium between-group<br>effect favoring MF app<br>group for non-reactivity,<br>$F(1,122) = 4.78$ , $p < 0.05$ , $d = 0.39$                                                                       | N/A                                                                                                                                                               |
| 1                              | Roy 2021<br>(USA)                    | Unwinding<br>Anxiety        | -           | TAU | 3 | 2  | 1%  | 4    | 8  | 28  | 33  | Adults with<br>at least<br>moderate<br>worry ( $\geq 10$<br>on GAD-7) | 41.95              | 15.43 | 90% female<br>8% male<br>2% Other | 87% White,<br>3% Black, 2%<br>Asian, 8%<br>Other                                        | Large between-group effect<br>favoring MF app group for<br>non-reactivity, with median<br>increase of 5 (IQR 6.3, $p < 0.01$ , $r = 0.95$ ) in MF app<br>group and no change in<br>controls      | Yes, effect persisted<br>at 8-week follow-up,<br>with median increase<br>of 7.5 (IQR 6, $p < 0.01$ , $r = 0.95$ ) in MF<br>app group and no<br>change in controls |
| 1                              | van Emmerik<br>2018<br>(Netherlands) | VGZ<br>Mindfulness<br>Coach | -           | WL  | 1 | 0  | 41% | 8    | 20 | 191 | 186 | Adults with<br>an interest<br>in<br>mindfulness<br>&<br>spirituality  | 44.72              | 9.83  | 96% female<br>4% male             | NR                                                                                      | Medium between-group<br>effect favoring MF app<br>group for non-reactivity, $b = 2.16$ , $SE = 0.49$ , $p < 0.01$ , $d = 0.43$                                                                   | Yes, gains maintained<br>at 20-week follow-up,<br>$b = 3.03$ , $SE = .60$ , $p < 0.01$ , $d = 0.77$                                                               |

|   |                               |                   |                       |    |    |   |     |   |    |    |    |                                                                           |                 |      |                                    |                                                                                          |                                                                                                                                                                                                                                                                                          |                                                                                                                                                                                   |
|---|-------------------------------|-------------------|-----------------------|----|----|---|-----|---|----|----|----|---------------------------------------------------------------------------|-----------------|------|------------------------------------|------------------------------------------------------------------------------------------|------------------------------------------------------------------------------------------------------------------------------------------------------------------------------------------------------------------------------------------------------------------------------------------|-----------------------------------------------------------------------------------------------------------------------------------------------------------------------------------|
| 1 | Huberty 2019 (USA)            | Calm              | -                     | WL | 1  | 2 | 19% | 8 | 12 | 33 | 39 | Adults with high stress ( $\geq 14$ on Perceived Stress Scale)            | 21.18           | 4.9  | 90% female<br>10% male             | 55% White, 17% Asian, 11% Biracial/Multiracial, 6% Black, 6% Other, 6% Prefer not to say | Between-group effect favoring MF app group; greater improvement in MF app (vs. control) group for non-reactivity (change = 3.78, $p < 0.01$ , effect size 0.92)                                                                                                                          | Yes, changes sustained at 12-week follow-up                                                                                                                                       |
| 1 | Orosa-Duarte 2021 (Spain) (p) | REM Volver a casa | *                     | WL | NR | 4 | 45% | 8 | -  | 31 | 53 | Students of health sciences (medicine, psychology, nursing, or nutrition) | 23              | 4.16 | 85% female<br>NR for other genders | NR                                                                                       | Between-group effect favoring MF app group; larger changes in MF app group than controls, change = 4.4 (CI 1.6, -7.1)                                                                                                                                                                    | N/A                                                                                                                                                                               |
| 2 | Orosa-Duarte 2021 (Spain) (a) | REM Volver a casa | Weekly in-person MBSR | *  | NR | 4 | 45% | 8 | 12 | 31 | 53 | Students of health sciences (medicine, psychology, nursing, or nutrition) | 23              | 4.16 | 85% female<br>NR for other genders | NR                                                                                       | No between-group differences; both app and active control group improved                                                                                                                                                                                                                 | N/A                                                                                                                                                                               |
| 2 | Yang 2018 (USA)               | Headspace         | -                     | WL | 0  | 0 | 24% | 4 | 8  | 45 | 43 | All students from a Southeastern US medical school                        | 25.11           | NR   | 64% female<br>36% male             | 47% White, 25% Asian/PI, 10% Biracial/Multiracial, 7% Black, 6% Latinx, 6% Other         | NR                                                                                                                                                                                                                                                                                       | No between-group differences; both MF app and active control group improved on non-reactivity from T1 (baseline) to T3 (follow-up 8 weeks later), $F(2,138) = 11.45$ , $p < 0.01$ |
| 2 | Kubo 2019 (USA) (pt)          | Headspace         | -                     | WL | 3  | 3 | 26% | 8 | -  | 40 | 32 | Patients with cancer currently/recently treated                           | 59 (median age) | NR   | 69% female<br>Other genders NR     | 65% White, 18% Other, 7% Asian, 6% AfAm, 4% Unknown                                      | No between-group differences in non-reactivity but trend toward effect favoring the MF app group, $F = 2.94$ , $p = 0.09$ , $d = 0.45$ ; MF app group had a significant within-group increase from baseline ( $M$ 14.9, $SD$ 3.7) to post-intervention ( $M$ 16.6, $SD$ 3.3), $p < 0.05$ | N/A                                                                                                                                                                               |

|                                           |                                      |                                |             |    |    |   |     |      |    |     |     |                                                                                             |                    |          |                                       |                                                                                                                   |                                                                                                                                                                                                                       |                                                                                                           |
|-------------------------------------------|--------------------------------------|--------------------------------|-------------|----|----|---|-----|------|----|-----|-----|---------------------------------------------------------------------------------------------|--------------------|----------|---------------------------------------|-------------------------------------------------------------------------------------------------------------------|-----------------------------------------------------------------------------------------------------------------------------------------------------------------------------------------------------------------------|-----------------------------------------------------------------------------------------------------------|
| 3                                         | Kubo 2019<br>(USA)<br>(cg)           | Headspace                      | -           | WL | 3  | 3 | 16% | 8    | -  | 13  | 13  | Caregivers<br>of patient<br>sample from<br>Kubo 2019<br>study                               | 63<br>(median age) | NR       | 58% female<br>Other<br>genders NR     | 77% White,<br>13% Other, 6%<br>Asian, 3%<br>AfAm                                                                  | No between-group<br>differences in non-judgment;<br>controls had within-group<br>improvement from baseline<br>( <i>M</i> 17.1, <i>SD</i> 4.2) to post-<br>intervention ( <i>M</i> 19.2, <i>SD</i><br>5.1), $p < 0.05$ | N/A                                                                                                       |
| 3                                         | Haliwa 2021<br>(USA)                 | Headspace                      | Peak<br>app | -  | 1  | 2 | 10% | 1.43 | -  | 69  | 70  | College<br>students<br>with<br>psychology<br>major                                          | 19.43              | 1.2<br>6 | 81% female<br>19% male                | 74% White,<br>8% Black, 6%<br>Hispanic, 6%<br>Asian, 1%<br>NatAm, 5%<br>Other                                     | No between- or within-group<br>differences in non-reactivity                                                                                                                                                          | N/A                                                                                                       |
| 0                                         | Levin 2022<br>(USA)                  | Stop,<br>Breathe, and<br>Think | -           | WL | 0  | 0 | 30% | 4    | -  | 10  | 13  | Students on<br>college<br>counseling<br>center<br>waitlist                                  | 20.43              | 2.46     | 100%<br>female                        | 87% White<br>non-Hispanic,<br>9% White<br>Hispanic, 4%<br>AI & White                                              | Small between-group effect<br>favoring the control group<br>for non-reactivity, Hedge's $g$<br>= -0.31 (CI -1.17, 0.54)                                                                                               | N/A                                                                                                       |
| <b>Non-judgment (<math>n = 10</math>)</b> |                                      |                                |             |    |    |   |     |      |    |     |     |                                                                                             |                    |          |                                       |                                                                                                                   |                                                                                                                                                                                                                       |                                                                                                           |
| 1                                         | Levin 2022<br>(USA)                  | Stop,<br>Breathe, and<br>Think | -           | WL | 0  | 0 | 30% | 4    | -  | 10  | 13  | Students on<br>college<br>counseling<br>center<br>waitlist                                  | 20.43              | 2.46     | 100%<br>female                        | 87% White<br>non-Hispanic,<br>9% White<br>Hispanic, 4%<br>AI & White                                              | Medium between-group<br>effect favoring MF app<br>group for non-judgment,<br>Hedge's $g = .56$ (CI -0.28,<br>1.46)                                                                                                    | N/A                                                                                                       |
| 1                                         | Orosa-Duarte<br>2021 (Spain)<br>(p)  | REM Volver<br>a casa           | *           | WL | NR | 4 | 45% | 8    | -  | 31  | 53  | Students of<br>health<br>sciences<br>(medicine,<br>psychology,<br>nursing, or<br>nutrition) | 23                 | 4.16     | 85% female<br>NR for other<br>genders | NR                                                                                                                | Between-group effect<br>favoring MF app group;<br>larger changes in MF app<br>(vs. control) group, change =<br>5.7 (CI 2.2, 9.2)                                                                                      | N/A                                                                                                       |
| 1                                         | van Emmerik<br>2018<br>(Netherlands) | VGZ<br>Mindfulness<br>Coach    | -           | WL | 1  | 0 | 41% | 8    | 20 | 191 | 186 | Adults with<br>an interest<br>in<br>mindfulness<br>&<br>spirituality                        | 44.72              | 9.83     | 96% female<br>4% male                 | NR                                                                                                                | Small-to-medium between-<br>group effect favoring MF<br>app group, $b = 2.19$ , $SE =$<br>0.71, $p < 0.01$ , $d = 0.34$                                                                                               | Yes, gains maintained<br>at 20-week follow-up,<br>$b = 2.68$ , $SE = 0.76$ , $p$<br>$< 0.01$ , $d = 0.47$ |
| 1                                         | Huberty 2019<br>(USA)                | Calm                           | -           | WL | 1  | 2 | 19% | 8    | 12 | 33  | 39  | Adults with<br>high stress<br>( $\geq 14$ on<br>Perceived<br>Stress<br>Scale)               | 21.18              | 4.9      | 90% female<br>10% male                | 55% White,<br>17% Asian,<br>11%<br>Biracial/Multir<br>acial, 6%<br>Black, 6%<br>Other, 6%<br>Prefer not to<br>say | Between-group effect<br>favoring MF app group;<br>greater improvement in MF<br>app (vs. control) group for<br>non-judgment, change =<br>4.94, $p < 0.01$ , effect size<br>0.76                                        | Yes, changes<br>sustained at 12-week<br>follow-up                                                         |

|   |                               |                   |                       |    |    |    |     |      |   |    |    |                                                                           |                 |      |                                    |                                                                                  |                                                                                                                                                                                                                                                          |                                                                                                                                                                      |
|---|-------------------------------|-------------------|-----------------------|----|----|----|-----|------|---|----|----|---------------------------------------------------------------------------|-----------------|------|------------------------------------|----------------------------------------------------------------------------------|----------------------------------------------------------------------------------------------------------------------------------------------------------------------------------------------------------------------------------------------------------|----------------------------------------------------------------------------------------------------------------------------------------------------------------------|
| 2 | Orosa-Duarte 2021 (Spain) (a) | REM Volver a casa | Weekly in-person MBSR | *  | NR | 4  | 45% | 8    | - | 31 | 53 | Students of health sciences (medicine, psychology, nursing, or nutrition) | 23              | 4.16 | 85% female<br>NR for other genders | NR                                                                               | No between-group differences; both groups improved                                                                                                                                                                                                       | N/A                                                                                                                                                                  |
| 2 | Kubo 2019 (USA) (pt)          | Headspace         | -                     | WL | 3  | 3  | 26% | 8    | - | 40 | 32 | Patients with cancer currently/recently treated                           | 59 (median age) | NR   | 69% female<br>Other genders NR     | 65% White, 18% Other, 7% Asian, 6% AfAm, 4% Unknown                              | No between-group differences in non-judgment; MF app group had a significant within-group increase from baseline ( $M$ 17.3, $SD$ 4.9) to post-intervention ( $M$ 18.4, $SD$ 4.2), $p < 0.05$ , but no change in controls                                | N/A                                                                                                                                                                  |
| 2 | Haliwa 2021 (USA)             | Headspace         | Peak app              | -  | 1  | 2  | 10% | 1.43 | - | 69 | 70 | College students with psychology major                                    | 19.43           | 1.26 | 81% female<br>19% male             | 74% White, 8% Black, 6% Hispanic, 6% Asian, 1% NatAm, 5% Other                   | No between-group differences; significant increase in both groups, $F(1,137) = 8.57$ , $p < 0.01$ , $np2 = .06$                                                                                                                                          | N/A                                                                                                                                                                  |
| 3 | Rich 2021 (UK)                | Headspace         | -                     | WL | 1  | NR | 19% | 8    | - | 45 | 56 | University employees                                                      | NR              | NR   | 70% female<br>30% male             | NR                                                                               | No between-group differences; trend toward significant between-group effect favoring MF app group, $F(1,122) = 3.32$ , $p = 0.07$ , $d = 0.33$ . (Note: Significant between-group effect for MF app group for completers of Headspace foundation course) | N/A                                                                                                                                                                  |
| 3 | Yang 2018 (USA)               | Headspace         | -                     | WL | 0  | 0  | 24% | 4    | 8 | 45 | 43 | All students from a Southeastern US medical school                        | 25.11           | NR   | 64% female<br>36% male             | 47% White, 25% Asian/PI, 10% Biracial/Multiracial, 7% Black, 6% Latinx, 6% Other | NR                                                                                                                                                                                                                                                       | No between-group differences; trend toward significant increase in both MF app and controls from baseline to follow-up 8 weeks later, $F(2,140) = 2.83$ , $p = 0.06$ |
| 3 | Kubo 2019 (USA) (cg)          | Headspace         | -                     | WL | 3  | 3  | 16% | 8    | - | 13 | 13 | Caregivers of patient sample from Kubo 2019 study                         | 63 (median age) | NR   | 58% female<br>Other genders NR     | 77% White, 13% Other, 6% Asian, 3% AfAm                                          | No between- or within-group differences                                                                                                                                                                                                                  | N/A                                                                                                                                                                  |

*Positive Affect (n = 5)*

|                                                           |                                |                             |                                               |     |    |    |     |      |    |      |      |                                                                                                |       |       |                                   |                                                                                                    |                                                                                                                                                                                                                       |                                                                                      |
|-----------------------------------------------------------|--------------------------------|-----------------------------|-----------------------------------------------|-----|----|----|-----|------|----|------|------|------------------------------------------------------------------------------------------------|-------|-------|-----------------------------------|----------------------------------------------------------------------------------------------------|-----------------------------------------------------------------------------------------------------------------------------------------------------------------------------------------------------------------------|--------------------------------------------------------------------------------------|
| 1                                                         | Sun 2021<br>(China)            | Spirits<br>Healing          | WeCha<br>t text-<br>based<br>consult<br>ation | -   | 1  | 1  | 31% | 8    | 18 | 84   | 84   | Depressed<br>pregnant<br>women (>9<br>on EPDS or<br>>4 on PHQ-<br>9)                           | 29.91 | 4.01  | 100%<br>female                    | 100% Asian<br>(99% Han, 1%<br>Hui)                                                                 | Medium between-group<br>effect favoring the MF app<br>group for positive affect, as<br>indicated by significant<br>group by time interaction,<br>$x^2_4 = 8.4, p < 0.05$                                              | N/A                                                                                  |
| 1                                                         | Howells 2016<br>(11 countries) | Headspace                   | Catch<br>Notes<br>(list-<br>making<br>app)    | -   | 1  | NR | 38% | 1.43 | -  | 57   | 64   | "Happiness<br>seekers"<br>(members of<br>self-improv.<br>newsletters<br>& soc. med.<br>groups) | 40.70 | 10.6  | 87% female<br>Others NR           | 90% White,<br>2% Asian/PI,<br>2% Hispanic,<br>5%<br>Other/Multirac<br>ial, 2% Prefer<br>not to say | Medium between-group<br>effect favoring the MF app<br>group for positive affect, $F =$<br>$9.13, p < 0.01, np2 = .07$                                                                                                 | N/A                                                                                  |
| 2                                                         | Haliwa 2021<br>(USA)           | Headspace                   | Peak<br>app                                   | -   | 1  | 2  | 10% | 1.43 | -  | 69   | 70   | College<br>students<br>with<br>psychology<br>major                                             | 19.43 | 1.26  | 81% female<br>19% male            | 74% White,<br>8% Black, 6%<br>Hispanic, 6%<br>Asian, 1%<br>NatAm, 5%<br>Other                      | No between-group<br>differences in positive affect;<br>significant increase in both<br>MF app group, $F(9,129) =$<br>$4.65, p < 0.01, np2 = 0.33,$<br>and control group, $F(9,129)$<br>$= 3.60, p < 0.01, np2 = 0.20$ | N/A                                                                                  |
| 2                                                         | Low 2020<br>(Australia)        | Headspace                   | Headsp<br>ace<br>PMR<br>App                   | -   | NR | 5  | 0%  | 6.85 | -  | 12   | 11   | Adults with<br>subclinical<br>and clinical<br>insomnia                                         | 36.39 | 11.74 | 13% male                          | NR                                                                                                 | No between-group<br>differences; both groups<br>improved on daytime<br>positive affect, $F(1,21) =$<br>$5.84, p < 0.05$                                                                                               |                                                                                      |
| 3                                                         | Versluis 2020<br>(Netherlands) | VGZ<br>Mindfulness<br>Coach | Emotio<br>n self-<br>monitor<br>ing           | -   | 1  | 2  | 15% | 4    | -  | 9    | 13   | High-<br>worrying<br>young<br>adults (45+<br>on PSWQ)                                          | 25.36 | 5.22  | 68% female<br>Other<br>genders NR | NR                                                                                                 | No between- or within-group<br>differences                                                                                                                                                                            | N/A                                                                                  |
| <b><i>Repetitive Negative Thinking: Worry (n = 7)</i></b> |                                |                             |                                               |     |    |    |     |      |    |      |      |                                                                                                |       |       |                                   |                                                                                                    |                                                                                                                                                                                                                       |                                                                                      |
| 1                                                         | Taylor 2022<br>(UK)            | Headspace                   | Moodz<br>one<br>(psycho<br>ed site)           | -   | 1  | 0  | 35% | 4    | 18 | 1095 | 1087 | Adult health<br>care<br>workers in<br>England                                                  | 40.53 | 10.97 | 83% female<br>16% male            | 93% White,<br>4% Asian, 2%<br>Mixed or<br>Multiracial,<br>1% Black                                 | Small between-group effect<br>favoring MF app group in<br>terms of worry reduction, $b =$<br>$-0.30, SE 0.11$ (CI $-0.51, -$<br>$0.09), p < 0.01$                                                                     | Between-group<br>differences were<br>significant at 4.5<br>months                    |
| 1                                                         | Gao 2022<br>(USA)              | Unwinding<br>Anxiety        | -                                             | TAU | 1  | 2  | 11% | 8    | 16 | 36   | 35   | Adults with<br>sleep-<br>interfering<br>worry                                                  | 41.41 | 17.57 | 80% female<br>17% male            | 62% White,<br>15% Asian,<br>14% Biracial<br>or Multiracial,<br>7% Hispanic,<br>1% Black            | Significant between-group<br>effect favoring MF app<br>group for worry, $\beta = -6.4, SE$<br>$= 1.89, p < 0.01$ ; MF app<br>(control) group had an<br>average worry reduction of<br>12% (0.3%)                       | Yes, gains in MF<br>group were<br>maintained at 16-<br>week follow-up, $p <$<br>0.01 |

|                                                                            |                                       |                             |                                     |     |   |   |     |   |    |     |     |                                                                       |                                                                                    |       |                                               |                                                                                                                              |                                                                                                                                                                                                                                                                                                                                                                                                                                                                                  |                                                                                                                                                                                                            |
|----------------------------------------------------------------------------|---------------------------------------|-----------------------------|-------------------------------------|-----|---|---|-----|---|----|-----|-----|-----------------------------------------------------------------------|------------------------------------------------------------------------------------|-------|-----------------------------------------------|------------------------------------------------------------------------------------------------------------------------------|----------------------------------------------------------------------------------------------------------------------------------------------------------------------------------------------------------------------------------------------------------------------------------------------------------------------------------------------------------------------------------------------------------------------------------------------------------------------------------|------------------------------------------------------------------------------------------------------------------------------------------------------------------------------------------------------------|
| 1                                                                          | Roy 2021<br>(USA)                     | Unwinding<br>Anxiety        | -                                   | TAU | 3 | 2 | 1%  | 4 | 8  | 28  | 33  | Adults with<br>at least<br>moderate<br>worry ( $\geq 10$<br>on GAD-7) | 41.95                                                                              | 15.43 | 90% female<br>8% male<br>2% Other             | 87% White,<br>3% Black, 2%<br>Asian, 8%<br>Other                                                                             | Medium-to-large between-<br>group effect favoring the MF<br>app group for worry, with<br>median reduction of 7.5<br>(IQR 8.5, $p < 0.01$ , $r = 0.67$ )<br>in MF app group but of 3<br>(IQR 4, $p = 0.01$ , $r = 0.44$ ) in<br>control group. Mediation<br>analysis revealed that worry<br>reduction partially mediated<br>the relationship between<br>mindfulness training and<br>anxiety reduction at 2<br>months, indirect effect = -<br>0.19 (CI 0.40, -0.02), $p <$<br>0.05 | Yes, effect persisted<br>at 8-week follow-up,<br>with median reduction<br>of 15 (IQR 14.3, $p <$<br>0.01, $r = 0.88$ ) in MF<br>app group and of 3<br>(IQR 6, $p < 0.01$ , $r =$<br>0.61) in control group |
| 2                                                                          | Versluis 2018<br>(Netherlands)<br>(a) | VGZ<br>Mindfulness<br>Coach | Emotio<br>n self-<br>monitor<br>ing | *   | 2 | 2 | 13% | 4 | -  | 46  | 90  | Adults with<br>work stress                                            | 43.23                                                                              | 11.39 | 74% female<br>Other<br>genders NR             | NR (95%<br>Dutch)                                                                                                            | No between-group<br>differences in trait worry,<br>which decreased over time<br>for all participants, $B = -$<br>1.18, $p < 0.05$                                                                                                                                                                                                                                                                                                                                                | N/A                                                                                                                                                                                                        |
| 2                                                                          | Versluis 2018<br>(Netherlands)<br>(p) | VGZ<br>Mindfulness<br>Coach | *                                   | WL  | 2 | 2 | 13% | 4 | -  | 46  | 90  | Adults with<br>work stress                                            | 43.23                                                                              | 11.39 | 74% female<br>Other<br>genders NR             | NR (95%<br>Dutch)                                                                                                            | No between-group<br>differences in trait worry,<br>which decreased over time<br>for all participants, $B = -$<br>1.18, $p < 0.05$                                                                                                                                                                                                                                                                                                                                                | N/A                                                                                                                                                                                                        |
| 3                                                                          | Versluis 2020<br>(Netherlands)        | VGZ<br>Mindfulness<br>Coach | Emotio<br>n self-<br>monitor<br>ing | -   | 1 | 2 | 15% | 4 | -  | 9   | 13  | High-<br>worrying<br>young<br>adults (45+<br>on PSWQ)                 | 25.36                                                                              | 5.22  | 68% female<br>Other<br>genders NR             | NR                                                                                                                           | No between- or within-group<br>differences                                                                                                                                                                                                                                                                                                                                                                                                                                       | N/A                                                                                                                                                                                                        |
| 3                                                                          | Abbott 2023<br>(USA)                  | Headspace                   | -                                   | WL  | 0 | 1 | 35% | 4 | -  | 50  | 56  | Adults with<br>elevated<br>anxiety or<br>worry                        | 24                                                                                 | 9     | 80% female<br>18% male<br>2% other            | 62% White,<br>14% Biracial<br>or Multiracial,<br>10% Hispanic<br>or Latinx, 8%<br>Asian, 5%<br>Black or<br>AfAm, 2%<br>NatAm | No between- or within-group<br>differences at 4 weeks                                                                                                                                                                                                                                                                                                                                                                                                                            | N/A                                                                                                                                                                                                        |
| <b><i>Repetitive Negative Thinking: Perseverative Thinking (n = 2)</i></b> |                                       |                             |                                     |     |   |   |     |   |    |     |     |                                                                       |                                                                                    |       |                                               |                                                                                                                              |                                                                                                                                                                                                                                                                                                                                                                                                                                                                                  |                                                                                                                                                                                                            |
| 1                                                                          | Hirshberg<br>2022 (USA)               | Healthy<br>Minds<br>Program | -                                   | WL  | 1 | 2 | 13% | 4 | 12 | 344 | 318 | Wisconsin<br>school<br>system<br>employees                            | <20y: 0.2%<br>20-30y: 15%<br>30-40y: 29%<br>40-50y: 30%<br>50-60y: 21%<br>>60y: 4% | NR    | 88% female<br>12% male<br>0.1% non-<br>binary | 91% White,<br>5% Latinx, 4%<br>Black/AfAm,<br>2% Asian/PI,<br>1% AI/AN                                                       | Small-to-medium between-<br>group effect favoring MF<br>app, $d = -0.35$ (CI -0.51, -<br>0.20), $p < 0.01$                                                                                                                                                                                                                                                                                                                                                                       | Yes, persisted at 3-<br>month follow-up, $d =$<br>-0.22 (CI -0.37, -<br>0.07), $p < 0.05$                                                                                                                  |

|                                                                |                            |                       |                           |                 |   |   |     |   |    |      |      |                                                              |       |       |                                |                                                                                 |                                                                                                                                                                                                                                                                                      |     |
|----------------------------------------------------------------|----------------------------|-----------------------|---------------------------|-----------------|---|---|-----|---|----|------|------|--------------------------------------------------------------|-------|-------|--------------------------------|---------------------------------------------------------------------------------|--------------------------------------------------------------------------------------------------------------------------------------------------------------------------------------------------------------------------------------------------------------------------------------|-----|
| 1                                                              | Goldberg 2020 (USA)        | Healthy Minds Program | -                         | WL              | 0 | 2 | 46% | 8 | -  | 228  | 115  | University of Wisconsin-Madison faculty, staff, and students | 41.74 | 12.52 | 85% female<br>15% male         | 82% White, 10% Multiracial, 5% Asian, 2% Black, 1% Latinx, 1% Prefer not to say | MF app group (vs. controls) showed greater improvements in perseverative thinking, $ddiff = -0.18, p = 0.01$                                                                                                                                                                         | N/A |
| <b><i>Repetitive Negative Thinking: Rumination (n = 1)</i></b> |                            |                       |                           |                 |   |   |     |   |    |      |      |                                                              |       |       |                                |                                                                                 |                                                                                                                                                                                                                                                                                      |     |
| 4                                                              | Taylor 2022 (UK)           | Headspace             | Moodz one (psychoed site) | -               | 1 | 0 | 35% | 4 | 18 | 1095 | 1087 | Adult health care workers in England                         | 40.53 | 10.97 | 83% female<br>16% male         | 93% White, 4% Asian, 2% Mixed or Multiracial, 1% Black                          | No between-group differences in rumination but trend toward significant effect favoring the MF app group, $b = -0.06, SE = 0.03$ (CI -0.12, 0), $p = 0.06$                                                                                                                           | No  |
| <b><i>Attention Regulation (n = 4)</i></b>                     |                            |                       |                           |                 |   |   |     |   |    |      |      |                                                              |       |       |                                |                                                                                 |                                                                                                                                                                                                                                                                                      |     |
| 1                                                              | Walsh 2019 (Canada)        | Wildflowers app       | 2048 app                  | -               | 1 | 1 | 20% | 3 | -  | 45   | 41   | College students                                             | 20.02 | 2.53  | 84% female<br>NR other genders | NR                                                                              | Small-to-medium between-group effect favoring the MF app group for the conflict monitoring component of attentional control, estimate = -0.47 (0.21), $t(84) = -2.29, p < 0.05$ , effect size = -0.24; no between- or within-group changes in alerting or orienting for either group | N/A |
| 1                                                              | Axelsen 2022 (Denmark) (a) | Headspace             | Music app                 | *               | 1 | 0 | 26% | 4 | -  | 167  | 292  | Healthy adults in small- to medium-sized Danish companies    | 38.83 | 9.68  | 53% male<br>47% female         | NR                                                                              | Large between-group effect favoring MF app group for sustained attention, $F(2,459) = 17.97, p < 0.01$ ; greater significant changes in MF app group, paired $t(166) = -10.37, p < 0.01, d = -0.80$ , than in active control group, paired $t(151) = -3.62, p < 0.01, d = -0.30$     | N/A |
| 1                                                              | Axelsen 2022 (Denmark) (p) | Headspace             | *                         | No intervention | 1 | 0 | 26% | 4 | -  | 167  | 292  | Healthy adults in small- to medium-sized Danish companies    | 38.83 | 9.68  | 53% male<br>47% female         | NR                                                                              | Large between-group effect favoring MF app group for sustained attention, $F(2,459) = 17.97, p < 0.01$ ; greater significant changes in MF app group, paired $t(166) = -10.37, p < 0.01, d = -0.80$ , but none in passive control group                                              | N/A |



|                                                              |                             |                       |                                               |    |   |    |     |      |    |     |     |                                                              |                                                                                    |       |                                           |                                                                                                |                                                                                                                                                                                                           |                                                                                                       |
|--------------------------------------------------------------|-----------------------------|-----------------------|-----------------------------------------------|----|---|----|-----|------|----|-----|-----|--------------------------------------------------------------|------------------------------------------------------------------------------------|-------|-------------------------------------------|------------------------------------------------------------------------------------------------|-----------------------------------------------------------------------------------------------------------------------------------------------------------------------------------------------------------|-------------------------------------------------------------------------------------------------------|
| 1                                                            | Ziegler 2019 (USA)          | MediTrain             | Duolin go, Tai Chi app, logic games app       | -  | 3 | 1  | 25% | 6    | -  | 22  | 18  | Healthy young adults                                         | 18-35 ( <i>M</i> age NR)                                                           | NR    | NR                                        | NR                                                                                             | Medium-to-large between-group effect favoring MF app group in sustained attention, $F(1,37) = 6.4$ (CI -17.8, -2.0), $p < 0.05$ , $d = -0.66$                                                             | N/A                                                                                                   |
| <b><i>Decentering/defusion (n = 3)</i></b>                   |                             |                       |                                               |    |   |    |     |      |    |     |     |                                                              |                                                                                    |       |                                           |                                                                                                |                                                                                                                                                                                                           |                                                                                                       |
| 1                                                            | Hirshberg 2022 (USA)        | Healthy Minds Program | -                                             | WL | 1 | 2  | 13% | 4    | 12 | 344 | 318 | Wisconsin school system employees                            | <20y: 0.2%<br>20-30y: 15%<br>30-40y: 29%<br>40-50y: 30%<br>50-60y: 21%<br>>60y: 4% | NR    | 88% female<br>12% male<br>0.1% non-binary | 91% White, 5% Latinx, 4% Black/AfAm, 2% Asian/PI, 1% AI/AN                                     | Medium between-group effect favoring MF app, $d = 0.40$ (CI 0.25 to 0.56), $p < 0.01$                                                                                                                     | Yes, persisted at 3-month follow-up, $d = 0.35$ (CI 0.20, 0.50), $p < 0.01$                           |
| 1                                                            | Haliwa 2021 (USA)           | Headspace             | Peak app                                      | -  | 1 | 2  | 10% | 1.43 | -  | 69  | 70  | College students with psychology major                       | 19.43                                                                              | 1.26  | 81% female<br>19% male                    | 74% White, 8% Black, 6% Hispanic, 6% Asian, 1% NatAm, 5% Other                                 | Large effect favoring the MF app group for decentering, $F(9,129) = 7.99$ , $p < 0.01$ , $\eta^2 = 0.36$                                                                                                  | N/A                                                                                                   |
| 1                                                            | Goldberg 2020 (USA)         | Healthy Minds Program | -                                             | WL | 0 | 2  | 46% | 8    | -  | 228 | 115 | University of Wisconsin-Madison faculty, staff, and students | 41.74                                                                              | 12.52 | 85% female<br>15% male                    | 82% White, 10% Multiracial, 5% Asian, 2% Black, 1% Latinx, 1% Prefer not to say                | MF app (vs. control) group showed greater increases in defusion, $ddiff = .41$ , $p < 0.01$                                                                                                               | N/A                                                                                                   |
| <b><i>Acceptance / Psychological Flexibility (n = 3)</i></b> |                             |                       |                                               |    |   |    |     |      |    |     |     |                                                              |                                                                                    |       |                                           |                                                                                                |                                                                                                                                                                                                           |                                                                                                       |
| 2                                                            | Ly 2014 (Sweden)            | Mindfulness           | Behavioral activation (BA) app by researchers | -  | 2 | NR | 14% | 8    | 24 | 41  | 40  | Adults diagnosed with MDD                                    | 36.10                                                                              | 10.8  | 70% female<br>30% male                    | NR                                                                                             | No significant between-group differences; medium-to-large within-group differences for both MF app group, $d = 1.06$ (CI -2.33, 4.44), $p < 0.05$ , and controls, $d = 0.80$ (CI -1.61, 3.21), $p < 0.01$ | Only MF app group sustained improvement at 6-month follow-up, $d = 1.68$ (CI -1.42, 4.78), $p < 0.01$ |
| 3                                                            | Ainsworth 2022 (UK)         | Headspace             | -                                             | WL | 0 | 0  | 30% | 6    | 12 | 93  | 51  | Adults with asthma                                           | 51.11                                                                              | 14.65 | NR                                        | MF App Grp: 97% White, 3% Indian<br>Ctrl Grp: 93% White, 2% Chinese/SE Asian, 2% Indian, 2% NR | No between- or within-group differences                                                                                                                                                                   | No between- or within-group differences in mindful acceptance at 12-week follow-up                    |
| 3                                                            | Versluis 2020 (Netherlands) | VGZ Mindfulness Coach | Emotion self-monitoring                       | -  | 1 | 2  | 15% | 4    | -  | 9   | 13  | High-worrying young adults (45+ on PSWQ)                     | 25.36                                                                              | 5.22  | 68% female<br>Other genders NR            | NR                                                                                             | No between- or within-group differences                                                                                                                                                                   | N/A                                                                                                   |

**Reappraisal, Suppression, Self-Regulation, Values, & Extinction (n = 5)**

|   |                                    |                          |   |    |    |   |     |   |   |    |    |                                                                        |       |      |                                |                                                          |                                                                                                                                                                                                                                                        |     |
|---|------------------------------------|--------------------------|---|----|----|---|-----|---|---|----|----|------------------------------------------------------------------------|-------|------|--------------------------------|----------------------------------------------------------|--------------------------------------------------------------------------------------------------------------------------------------------------------------------------------------------------------------------------------------------------------|-----|
| 1 | Schulte-Frankenfeld 2021 (Germany) | Balloon App              | - | WL | NR | 0 | 35% | 8 | - | 30 | 34 | College students who work part time                                    | 24.75 | 5.42 | 64% female<br>36% male         | NR                                                       | Large between-group effect favoring MF app group for reappraisal, $F = 9.72$ , $p < 0.01$ , $np2 = 0.14$                                                                                                                                               | N/A |
| 1 | Schulte-Frankenfeld 2021 (Germany) | Balloon App              | - | WL | NR | 0 | 35% | 8 | - | 30 | 34 | College students who work part time                                    | 24.75 | 5.42 | 64% female<br>36% male         | NR                                                       | Large between-group effect favoring MF app group for self-regulation, $F = 15.05$ , $p < 0.01$ , $np2 = 0.20$                                                                                                                                          | N/A |
| 1 | Levin 2022 (USA)                   | Stop, Breathe, and Think | - | WL | 0  | 0 | 30% | 4 | - | 10 | 13 | Students on college counseling center waitlist                         | 20.43 | 2.46 | 100% female                    | 87% White non-Hispanic, 9% White Hispanic, 4% AI & White | Large between-group effect favoring MF app for values progress, Hedge's $g = .85$ (CI -0.06, 1.83)                                                                                                                                                     | N/A |
| 1 | Bjorkstrand 2019 (Sweden)          | Headspace                | - | WL | NR | 2 | 0%  | 4 | - | 11 | 15 | Health university employees with high educational attainment (>12 yrs) | 35.1  | 6.2  | 80% female<br>Other genders NR | NR                                                       | MF app group had greater significant retention of extinction learning compared to control group, as indicated by less spontaneous recovery of conditioned threat responses in the 24 h after extinction training, $t = 2.47$ , $p < 0.05$ , $d = 0.98$ | N/A |
| 2 | Schulte-Frankenfeld 2021 (Germany) | Balloon App              | - | WL | NR | 0 | 35% | 8 | - | 30 | 34 | College students who work part time                                    | 24.75 | 5.42 | 64% female<br>36% male         | NR                                                       | No between-group differences in suppression; both groups improved, $F = 5.71$ , $p < 0.05$ , $np2 = 0.08$                                                                                                                                              | N/A |

**Note. Top row:** T1 Effect = Effect at post-intervention; MF app = Mindfulness app; Grp = Group; Ctrl = Control; wks = weeks; F/up = follow-up; <sup>A</sup>Codes for effect at post-intervention (0 = between-group effect favoring the control group, 1 = between-group effect favoring the MF app group, 2 = no between-group differences as both groups improved or there was a within-group difference favoring MF app group, 3 = no between-group differences as neither group improved or there was a within-group difference favoring control group, 4 = no between-group differences and unclear whether both or neither improved); <sup>B</sup>Codes for support types (0 = none offered, 1 = automated reminders to use app, 2 = human support provided, 3 = both 1 & 2, NR = Not Reported); <sup>C</sup>Codes for incentives (0 = none offered, 1 = financial incentives to use the app, 2 = financial incentives for self-report completion only, 3 = both 1 & 2, 4 = Other incentive, NR = Not Reported). **Demographics column:** Demographics presented here as reported in each study; AfAm = African American, AI/AN = American Indian / Alaska Native, NatAm = Native American, PI = Pacific Islander, SE = Southeast, NR = Not Reported. **First Author & Year (Study Location) column:** (a) = this row refers to data from comparison of MF app group to active control group; (p) = this row refers to data from comparison of MF app group to passive control group; (pt) = study with pt sample; (cg) = study with caregiver sample. **Control Group columns:** if \* appears in Active (Passive) Ctrl Grp column = this study included an active (passive) control group but this row refers to data from comparison of MF app group with passive (active) control group. WL = Waitlist control group.

**eTable 7. App Characteristics**

| App name               | App developer                              | Languages                      | Key Mindfulness (MF) Content |                                   |                       |                          | Primary Format |       |       | Supporting Features |                         |           |                  |                    |                                                                                       |
|------------------------|--------------------------------------------|--------------------------------|------------------------------|-----------------------------------|-----------------------|--------------------------|----------------|-------|-------|---------------------|-------------------------|-----------|------------------|--------------------|---------------------------------------------------------------------------------------|
|                        |                                            |                                | MF basics                    | Themed practice (e.g., MF & pain) | Guided timed practice | Un-guided timed practice | Written        | Audio | Video | Mood check-in       | Other interactive tools | Msg board | Practice tracker | Practice reminders | Other features                                                                        |
| Headspace              | Headspace Inc.                             | 1-5                            | x                            | x                                 | x                     |                          |                | x     | x     |                     |                         |           | x                | x                  | mindful movement, music, mental health podcasts                                       |
| VGZ Mindfulness Coach  | Zorgverzekeraar VGZ                        | 8                              | x                            |                                   | x                     |                          |                | x     |       |                     |                         |           |                  |                    | mindful movement                                                                      |
| Unwinding Anxiety      | Mind-Sciences, Inc.                        | 1                              | x                            | x                                 | x                     |                          | x              | x     | x     | x                   | x                       | x         | x                | x                  | sensation check-ins & practice suggestions, worry-specific info, goal setting feature |
| Healthy Minds Program  | Healthy Minds Innovations, Inc.            | 1                              | x                            | x                                 | x                     | x                        |                | x     |       |                     | x                       |           | x                | x                  | customizable duration & format, self-assessments, podcasts                            |
| Calm                   | Calm.com, Inc.                             | 1-7                            | x                            | x                                 | x                     |                          |                | x     | x     | x                   | x                       |           | x                | x                  | reflection prompts, sleep tracker, podcasts, music, soothing sounds                   |
| *Stop, Breathe & Think | Stop, Breathe & Think                      | 1 (app not avail.)             | x                            | x                                 | x                     |                          |                | x     |       | x                   |                         |           |                  |                    | check-in & practice suggestions                                                       |
| Craving to Quit        | Sharecare, Inc.                            | 1                              | x                            | x                                 | x                     |                          |                | x     | x     | x                   | x                       | x         | x                | x                  | Q&A with expert; working mindfully with cravings                                      |
| *Medi-Train            | Neuroscape Center at UCSF                  | 1                              | x                            |                                   | x                     | x                        | x              | x     |       | x                   | x                       |           | x                |                    | Interactive screen assessing ability to focus on breath, daily tips, progress graph   |
| *Balloon App           | MissionMe (Gruner + Jahr Deutschland GmbH) | 4 (app avail. only in Germany) | x                            | x                                 | x                     |                          |                | x     |       |                     |                         |           | x                | x                  | Calendar of practice, themed courses (e.g., Sleep Better, Reduce Stress)              |

|                         |                                                       |                                                             |   |   |   |   |   |   |   |   |                                                         |
|-------------------------|-------------------------------------------------------|-------------------------------------------------------------|---|---|---|---|---|---|---|---|---------------------------------------------------------|
| REM<br>Volver a<br>Casa | Espacio de<br>Formación<br>en Salud y<br>Psicoterapia | 2                                                           | x | x | x | x | x | x | x | x | Special focus on<br>integrating MF in<br>daily life     |
| *Spirits<br>Healing     | NR                                                    | 10 ( <i>app<br/>avail. only<br/>in mainland<br/>China</i> ) | x | x | x |   | x | x | x | x | Mindfulness journal                                     |
| *Wild-<br>flowers app   | Mobio<br>Interactive<br>Inc.                          | 1 ( <i>app not<br/>avail.</i> )                             | x | x | x |   | x | x |   | x | Practice suggestions<br>based on mood &<br>stress level |
| *Mind-<br>fulness app   | NR                                                    | UNC ( <i>app<br/>not avail.</i> )                           | x |   | x | x |   | x |   |   |                                                         |

*Note.* Languages: 1 = English, 2 = Spanish, 3 = French, 4 = German, 5 = Portuguese, 6 = Korean, 7 = Japanese, 9 = Dutch, 10 = Chinese, UNC = Unclear. MF basics = Mindfulness psychoeducation and instruction in basic mindfulness techniques. App not avail. = App no longer available in app stores. MF = Mindfulness. \*App not accessible so features were rated based on app description in the papers that evaluated it.

## References

1. Hayes-Skelton, S. A. & Lee, C. S. Decentering in Mindfulness and Cognitive Restructuring for Social Anxiety: An Experimental Study of a Potential Common Mechanism. *Behav Modif* **44**, 817–840 (2020).
2. Tran, U. S. *et al.* The Serenity of the Meditating Mind: A Cross-Cultural Psychometric Study on a Two-Factor Higher Order Structure of Mindfulness, Its Effects, and Mechanisms Related to Mental Health among Experienced Meditators. *PLOS ONE* **9**, e110192 (2014).
3. Hoge, E. A. *et al.* Change in Decentering Mediates Improvement in Anxiety in Mindfulness-Based Stress Reduction for Generalized Anxiety Disorder. *Cognit Ther Res* **39**, 228–235 (2015).
4. Carmody, J., Baer, R. A., L. B. Lykins, E. & Olendzki, N. An empirical study of the mechanisms of mindfulness in a mindfulness-based stress reduction program. *Journal of Clinical Psychology* **65**, 613–626 (2009).
5. Burzler, M. A., Voracek, M., Hos, M. & Tran, U. S. Mechanisms of Mindfulness in the General Population. *Mindfulness* **10**, 469–480 (2019).
6. Freudenthaler, L., Turba, J. D. & Tran, U. S. Emotion Regulation Mediates the Associations of Mindfulness on Symptoms of Depression and Anxiety in the General Population. *Mindfulness (N Y)* **8**, 1339–1344 (2017).
7. Parmentier, F. B. R. *et al.* Mindfulness and Symptoms of Depression and Anxiety in the General Population: The Mediating Roles of Worry, Rumination, Reappraisal and Suppression. *Frontiers in Psychology* **10**, (2019).
8. Desrosiers, A., Vine, V., Klemanski, D. H. & Nolen-Hoeksema, S. Mindfulness and emotion regulation in depression and anxiety: common and distinct mechanisms of action. *Depress Anxiety* **30**, 654–661 (2013).
9. Britton, W. B., Shahar, B., Szepsenwol, O. & Jacobs, W. J. Mindfulness-based cognitive therapy improves emotional reactivity to social stress: results from a randomized controlled trial. *Behav Ther* **43**, 365–380 (2012).
10. Batink, T., Peeters, F., Geschwind, N., van Os, J. & Wichers, M. How does MBCT for depression work? studying cognitive and affective mediation pathways. *PLoS One* **8**, e72778 (2013).
11. McLaughlin, L. E., Luberto, C. M., O'Bryan, E. M., Kraemer, K. M. & McLeish, A. C. The indirect effect of positive affect in the relationship between trait mindfulness and emotion dysregulation. *Pers Individ Dif* **145**, 70–74 (2019).
12. Haliwa, I., Ford, C. G., Wilson, J. M. & Shook, N. J. A Mixed-Method Assessment of a 10-Day Mobile Mindfulness Intervention. *Front Psychol* **12**, 722995 (2021).
13. Walsh, K., Saab, B. & Farb, N. Effects of a Mindfulness Meditation App on Subjective Well-Being: Active Randomized Controlled Trial and Experience Sampling Study. *JMIR MENTAL HEALTH* **6**, (2019).
14. Axelsen, J. L., Meline, J. S. J., Staiano, W. & Kirk, U. Mindfulness and music interventions in the workplace: assessment of sustained attention and working memory using a crowdsourcing approach. *BMC Psychol* **10**, 108 (2022).
15. Levin, M. E., Hicks, E. T. & Krafft, J. Pilot evaluation of the stop, breathe & think mindfulness app for student clients on a college counseling center waitlist. *J Am Coll Health* **70**, 165–173 (2022).
16. Goldberg, S. B. *et al.* Alliance With an Unguided Smartphone App: Validation of the Digital Working Alliance Inventory. *Assessment* **29**, 1331–1345 (2022).

17. Rich, A. *et al.* Evaluation of a novel intervention to reduce burnout in doctors-in-training using self-care and digital wellbeing strategies: a mixed-methods pilot. *BMC Med Educ* **20**, 294 (2020).
18. Yang, E., Schamber, E., Meyer, R. M. L. & Gold, J. I. Happier Healers: Randomized Controlled Trial of Mobile Mindfulness for Stress Management. *The Journal of Alternative and Complementary Medicine* **24**, 505–513 (2018).
19. Hirshberg, M. J. *et al.* A randomized controlled trial of a smartphone-based well-being training in public school system employees during the COVID-19 pandemic. *Journal of Educational Psychology* (2022) doi:10.1037/edu0000739.
20. Versluis, A., Verkuil, B., Spinhoven, P. & Brosschot, J. F. Feasibility and effectiveness of a worry-reduction training using the smartphone: A pilot randomised controlled trial. *British Journal of Guidance & Counselling* **48**, 227–239 (2020).
21. van Emmerik, A. A. P., Berings, F. & Lancee, J. Efficacy of a Mindfulness-Based Mobile Application: a Randomized Waiting-List Controlled Trial. *Mindfulness (N Y)* **9**, 187–198 (2018).
22. Ainsworth, B. *et al.* A feasibility trial of a digital mindfulness-based intervention to improve asthma-related quality of life for primary care patients with asthma. *J Behav Med* **45**, 133–147 (2022).
23. Kubo, A. *et al.* A Randomized Controlled Trial of mHealth Mindfulness Intervention for Cancer Patients and Informal Cancer Caregivers: A Feasibility Study Within an Integrated Health Care Delivery System. *Integr Cancer Ther* **18**, 153473541985063 (2019).
24. Sun, Y. *et al.* Effectiveness of Smartphone-Based Mindfulness Training on Maternal Perinatal Depression: Randomized Controlled Trial. *J Med Internet Res* **23**, e23410 (2021).
25. Gao, M. *et al.* Targeting Anxiety to Improve Sleep Disturbance: A Randomized Clinical Trial of App-Based Mindfulness Training. *Psychosom Med* **84**, 632–642 (2022).
